# Supplementary material for: circAFF1 Aggravates Vascular Endothelial Cell Dysfunction Mediated by miR-516b/SAV1/YAP1 Axis
Source: Front Physiol. 2020 Aug 5;11:899. doi: 10.3389/fphys.2020.00899 (PMC7425207; doi:10.3389/fphys.2020.00899)
Supplement: Supplementary file 1 [file Table_1.XLS]

## Sheet: SAH总数
Patient ID	Gender	Age	Hunt-Hess
00403774	female	16-20	0
00386658	male	26-30	0
00396348	male	26-30	0
00413774	male	41-45	0
00382223	male	41-45	0
00390814	male	41-45	0
00399862	female	46-50	0
00416534	female	46-50	0
00398345	female	51-55	0
00398363	female	51-55	0
00400494	female	56-60	0
00388895	female	56-60	0
00391010	female	56-60	0
00400928	female	56-60	0
00414513	female	56-60	0
00420356	female	56-60	0
00403248	male	56-60	0
00396114	female	61-65	0
00411376	female	61-65	0
00430664	female	61-65	0
00413881	male	61-65	0
00421495	male	61-65	0
00424825	male	61-65	0
00407517	female	61-65	0
00422799	female	66-70	0
00405955	male	66-70	0
00397972	female	66-70	0
00424946	female	71-75	0
00430041	male	51-55	1
00404243	female	56-60	1
00404829	female	61-65	1
00408070	male	66-70	1
00388025	female	76-80	1
00417843	male	21-25	2
00388702	male	26-30	2
00423226	male	26-30	2
00385392	male	26-30	2
00406400	female	31-35	2
00410046	male	31-35	2
00423562	male	36-40	2
00401512	male	36-40	2
00408787	male	36-40	2
00425313	male	36-40	2
00404123	female	36-40	2
00408792	female	36-40	2
00387849	male	36-40	2
00410178	female	41-45	2
00384405	female	41-45	2
00420649	female	41-45	2
00406213	female	41-45	2
00407714	female	41-45	2
00402736	male	41-45	2
00383668	female	41-45	2
00407093	female	41-45	2
00390707	male	41-45	2
00405832	female	41-45	2
00382767	male	41-45	2
00407215	male	41-45	2
00383496	female	46-50	2
00383996	female	46-50	2
00394686	male	46-50	2
00430972	male	46-50	2
00389403	female	46-50	2
00399975	female	46-50	2
00387659	male	46-50	2
00427220	male	46-50	2
00384615	female	46-50	2
00386641	female	46-50	2
00392975	female	46-50	2
00417571	female	46-50	2
00420038	female	46-50	2
00425007	female	46-50	2
00426309	female	46-50	2
00385407	female	46-50	2
00389379	female	46-50	2
00403753	female	46-50	2
00415916	female	46-50	2
00382812	male	46-50	2
00401945	male	46-50	2
00405927	male	46-50	2
00407465	female	46-50	2
00414050	female	46-50	2
00415550	female	46-50	2
00412446	male	46-50	2
00425990	male	46-50	2
00410155	female	51-55	2
00420425	female	51-55	2
00430376	female	51-55	2
00406988	male	51-55	2
00421097	male	51-55	2
00403755	female	51-55	2
00388005	male	51-55	2
00383021	female	51-55	2
00406453	female	51-55	2
00423584	female	51-55	2
00389574	male	51-55	2
00389766	male	51-55	2
00392662	male	51-55	2
00405330	male	51-55	2
00386725	female	51-55	2
00390129	female	51-55	2
00398919	female	51-55	2
00423564	female	51-55	2
00429020	female	51-55	2
00395908	male	51-55	2
00398555	male	51-55	2
00415199	male	51-55	2
00392870	female	51-55	2
00401760	female	51-55	2
00415968	female	51-55	2
00420405	female	51-55	2
00430155	female	51-55	2
00388398	male	51-55	2
00388566	male	51-55	2
00398335	male	51-55	2
00406644	male	51-55	2
00384436	female	56-60	2
00397599	female	56-60	2
00406456	female	56-60	2
00402544	male	56-60	2
00428377	male	56-60	2
00422099	female	56-60	2
00396826	female	56-60	2
00426840	male	56-60	2
00396236	male	56-60	2
00387194	female	56-60	2
00395591	female	56-60	2
00423528	female	56-60	2
00425889	female	56-60	2
00412560	male	56-60	2
00382465	female	61-65	2
00415967	female	61-65	2
00384564	male	61-65	2
00392856	female	61-65	2
00429015	male	61-65	2
00399356	female	61-65	2
00406857	female	61-65	2
00421540	female	61-65	2
00384483	male	61-65	2
00394060	male	61-65	2
00421338	male	61-65	2
00418270	female	61-65	2
00423847	female	61-65	2
00430988	female	61-65	2
00405841	male	61-65	2
00382818	female	61-65	2
00425927	female	61-65	2
00427991	female	61-65	2
00431705	male	61-65	2
00399738	female	66-70	2
00404849	female	66-70	2
00403935	male	66-70	2
00382813	female	66-70	2
00390223	female	66-70	2
00392411	female	66-70	2
00402460	female	66-70	2
00403920	female	66-70	2
00422894	female	66-70	2
00395940	male	66-70	2
00402512	male	66-70	2
00419997	female	66-70	2
00430695	female	66-70	2
00403726	male	66-70	2
00423857	male	66-70	2
00382176	female	66-70	2
00393356	female	66-70	2
00394335	female	66-70	2
00418284	female	66-70	2
00391306	male	66-70	2
00395966	female	66-70	2
00416978	female	66-70	2
00430978	female	66-70	2
00417080	female	71-75	2
00385476	male	71-75	2
00383007	female	71-75	2
00406858	female	71-75	2
00428757	female	71-75	2
00384114	male	71-75	2
00394688	male	71-75	2
00384016	female	71-75	2
00396558	female	71-75	2
00401778	female	71-75	2
00422858	female	71-75	2
00402099	female	71-75	2
00397053	female	76-80	2
00420761	female	76-80	2
00392400	female	81-85	2
00421314	female	81-85	2
00383785	female	81-85	2
00430087	female	81-85	2
00410473	female	86-90	2
00421986	male	26-30	3
00392344	male	31-35	3
00405136	male	31-35	3
00395280	female	41-45	3
00384665	female	41-45	3
00394592	female	41-45	3
00410725	male	46-50	3
00420639	male	46-50	3
00412601	female	46-50	3
00404229	female	51-55	3
00386678	female	51-55	3
00399657	male	51-55	3
00397072	female	51-55	3
00396910	male	51-55	3
00430124	male	56-60	3
00385290	female	56-60	3
00419806	female	61-65	3
00422100	female	61-65	3
00400632	female	61-65	3
00405761	female	61-65	3
00394176	female	61-65	3
00411031	female	61-65	3
00382757	female	61-65	3
00413667	female	61-65	3
00428372	female	61-65	3
00428463	female	61-65	3
00430246	female	61-65	3
00397070	male	66-70	3
00382093	male	66-70	3
00401846	male	66-70	3
00427926	female	66-70	3
00406768	male	71-75	3
00419767	male	41-45	4
00389384	female	46-50	4
00396628	female	46-50	4
00403054	female	46-50	4
00399118	male	46-50	4
00403402	female	46-50	4
00387756	male	56-60	4
00389339	female	61-65	4
00420471	male	61-65	4
00384844	female	71-75	4
00428017	female	71-75	4
00393465	male	61-65
